# Supplementary material for: Human colon function ex vivo: Dependence on oxygen and sensitivity to antibiotic
Source: PubMed Central journal article supplement (PMC6522050; doi:10.1371/journal.pone.0217170), 2019-05-16
Supplement: pone.0217170.s001.pdf [file pone.0217170.s001.pdf]

S1 Table

| Biochemical Name                                             | Database <sup>1</sup> |          |           | Fold Difference <sup>2,3</sup> |                     |
|--------------------------------------------------------------|-----------------------|----------|-----------|--------------------------------|---------------------|
|                                                              | KEGG                  | PUBCHEM  | HMDB      | PS/NPS <sup>4</sup>            | 20%/1% <sup>5</sup> |
| (N(1) + N(8))-acetylpermidine                                | -                     | -        | -         | <b>0.0422</b>                  | 1.2451              |
| 1-(1-enyl-stearoyl)-GPE (P-18:0)                             | -                     | -        | -         | 1.1576                         | 1.038               |
| 1-methyl-4-imidazoleacetate                                  | C05828                | 75810    | HMDB02820 | 0.9844                         | <b>1.6007</b>       |
| 1-methylnicotinamide                                         | C02918                | 10129985 | HMDB00699 | <b>2.0959</b>                  | 1.2147              |
| 1-oleoyl-glycerophospho-ethanolamine (GPE; 18:1)             | -                     | 9547071  | HMDB11506 | <b>0.2051</b>                  | 1.0769              |
| 1-oleoyl-glycerophospho-glycine (GPG; 18:1)                  | -                     | -        | -         | <b>0.351</b>                   | 0.9944              |
| 1-palmitoyl-2-oleoyl-glycerophospho-choline (GPC; 16:0/18:1) | -                     | 6436017  | HMDB07972 | 0.9525                         | 0.9488              |
| 1-palmitoyl-2-oleoyl-GPE (16:0/18:1)                         | -                     | 5283496  | HMDB05320 | <b>0.4211</b>                  | 1.0898              |
| 1-palmitoyl-GPE (16:0)                                       | -                     | 9547069  | HMDB11503 | <b>0.1138</b>                  | 1.2431              |
| 1-palmitoyl-GPG (16:0)                                       | -                     | 3300276  | -         | <b>0.1486</b>                  | 1.1921              |
| 1-stearoyl-GPC (18:0)                                        | -                     | 497299   | HMDB10384 | 1.1167                         | 1.0997              |
| 1-stearoyl-GPE (18:0)                                        | -                     | 9547068  | HMDB11130 | <b>0.7486</b>                  | 1.0686              |
| 1-stearoyl-glycerophospho-inositol (GPI; 18:0)               | -                     | -        | HMDB61696 | 1.31                           | 1.1588              |
| 2,3-dihydroxy-2-methylbutyrate                               | -                     | 301941   | HMDB29576 | <b>0.0796</b>                  | 1.1258              |
| 2,3-dihydroxyisovalerate                                     | C04039                | 677      | HMDB12141 | <b>0.0203</b>                  | 1.0238              |
| 2,4-dichlorophenol sulfate                                   | -                     | 9837697  | -         | <b>2.2402</b>                  | <b>0.2024</b>       |
| 2-aminoadipate                                               | C00956                | 469      | HMDB00510 | <b>0.3218</b>                  | 0.8916              |
| 2'-deoxycytidine                                             | C00881                | 13711    | HMDB00014 | <b>2.3968</b>                  | 0.8279              |
| 2'-deoxyuridine                                              | C00526                | 13712    | HMDB00012 | <b>2.6871</b>                  | 1.1013              |
| 2-hydroxy-3-methylvalerate                                   | -                     | 164623   | HMDB00317 | <b>0.0056</b>                  | <i>0.6062</i>       |
| 2-hydroxyadipate                                             | C02360                | 193530   | HMDB00321 | <b>0.1444</b>                  | 0.7765              |
| 2-hydroxybutyrate/2-hydroxyisobutyrate                       | -                     | -        | -         | <b>0.341</b>                   | <b>0.4398</b>       |
| 2-hydroxyglutarate                                           | C02630                | 43       | HMDB00606 | <b>0.0091</b>                  | 1.1134              |
| 2-methylcitrate/homocitrate                                  | -                     | -        | -         | <b>0.1082</b>                  | 2.7146              |
| 2-oxoadipate                                                 | C00322                | 71       | HMDB00225 | <b>0.0108</b>                  | 3.1639              |
| 2-oxoarginine                                                | C03771                | 558      | HMDB04225 | <b>0.4882</b>                  | 1.2694              |
| 3-(4-hydroxyphenyl)lactate                                   | C03672                | 9378     | HMDB00755 | <b>0.0128</b>                  | 1.2101              |
| 3-deoxyoctulosonate                                          | -                     | 4636210  | -         | <b>0.0771</b>                  | 1.3928              |
| 3-hydroxy-3-methylglutarate                                  | C03761                | 1662     | HMDB00355 | 1.3374                         | 1.7768              |
| 3-hydroxybutyrate (BHBA)                                     | C01089                | 441      | HMDB00357 | 0.5105                         | 1.1556              |
| 3-hydroxydecanoate                                           | -                     | 26612    | HMDB02203 | <b>0.2259</b>                  | 1.4838              |
| 3-hydroxyisobutyrate                                         | C06001                | 87       | HMDB00336 | 0.8546                         | <b>4.713</b>        |
| 3-hydroxylaurate                                             | -                     | 94216    | HMDB00387 | <b>0.134</b>                   | 1.8042              |
| 3-hydroxymyristate                                           | -                     | 16064    | -         | <b>0.2848</b>                  | 1.3447              |
| 3-hydroxyoctanoate                                           | -                     | 26613    | HMDB01954 | <b>0.1609</b>                  | 1.3401              |
| 3-methyl-2-oxobutyrate                                       | C00141                | 49       | HMDB00019 | 0.8698                         | 1.5135              |
| 3-methyl-2-oxovalerate                                       | C00671                | 47       | HMDB03736 | <b>0.2412</b>                  | 1.4748              |
| 3-sulfo-L-alanine                                            | C00506                | 72886    | HMDB02757 | <b>6.3592</b>                  | 1.1185              |
| 3-ureidoisobutyrate                                          | C05100                | 160663   | HMDB02031 | <b>0.4537</b>                  | 1.2057              |
| 3-ureidopropionate                                           | C02642                | 111      | HMDB00026 | <b>0.347</b>                   | 0.9643              |
| 4-acetamidobenzoate                                          | D03836                | 19266    | -         | <b>0.283</b>                   | 1.0645              |
| 4-acetamidobutanoate                                         | C02946                | 18189    | HMDB03681 | <b>0.3559</b>                  | <b>4.3372</b>       |
| 4-ethylphenylsulfate                                         | C13637                | -        | -         | <b>2.7144</b>                  | <b>0.5132</b>       |

|                                     |        |         |           |                 |               |
|-------------------------------------|--------|---------|-----------|-----------------|---------------|
| 4-guanidinobutanoate                | C01035 | 500     | HMDB03464 | <b>0.4857</b>   | 1.0852        |
| 4-hydroxyphenylpyruvate             | C01179 | 979     | HMDB00707 | <b>0.0256</b>   | 1.4647        |
| 4-imidazoleacetate                  | C02835 | 96215   | HMDB02024 | <b>0.1118</b>   | 1.4199        |
| 4-methyl-2-oxopentanoate            | C00233 | 70      | HMDB00695 | 0.4224          | 1.4294        |
| 4-methylbenzenesulfonate            | C06677 | 6101    | -         | 0.5982          | 0.5664        |
| 5-(2-Hydroxyethyl)-4-methylthiazole | C04294 | 1136    | -         | <b>0.7255</b>   | 1.1441        |
| 5-aminovalerate                     | C00431 | 138     | HMDB03355 | <b>0.0822</b>   | 0.6266        |
| 5-hydroxylysine                     | C16741 | 1029    | HMDB00450 | <b>1.3772</b>   | 0.838         |
| 5-methylthioadenosine               | C00170 | 439176  | HMDB01173 | <b>0.4323</b>   | 0.7994        |
| 5-oxoproline                        | C01879 | 7405    | HMDB00267 | 1.2909          | <b>5.1653</b> |
| 6-oxopiperidine-2-carboxylate       | -      | 3014237 | HMDB61705 | <b>0.0073</b>   | 1.8124        |
| 7-methylguanine                     | C02242 | 11361   | HMDB00897 | <b>0.0541</b>   | 1.1447        |
| acetylcarnitine (C2)                | C02571 | 1       | HMDB00201 | <b>4.9199</b>   | 1.4237        |
| aconitate [cis or trans]            | -      | -       | -         | <b>0.0582</b>   | 1.4204        |
| adenine                             | C00147 | 190     | HMDB00034 | <b>0.1767</b>   | 1.0285        |
| agmatine                            | C00179 | 199     | HMDB01432 | <b>0.1028</b>   | 0.6998        |
| alanine                             | C00041 | 5950    | HMDB00161 | <b>6.6736</b>   | 0.8385        |
| allantoin                           | C02350 | 204     | HMDB00462 | <b>2.2118</b>   | 0.676         |
| alpha-hydroxyisocaproate            | C03264 | 83697   | HMDB00746 | <b>0.0026</b>   | 0.608         |
| alpha-hydroxyisovalerate            | -      | 99823   | HMDB00407 | <b>0.0046</b>   | 0.95          |
| alpha-ketoglutaramate               | -      | -       | -         | <b>0.4266</b>   | <b>1.5975</b> |
| alpha-ketoglutarate                 | C00026 | 51      | HMDB00208 | <b>0.0329</b>   | 2.0285        |
| alpha-tocopherol                    | C02477 | 14985   | HMDB01893 | <b>0.5291</b>   | 1.1258        |
| alpha-tocopherol acetate            | C13202 | 2117    | HMDB34227 | 0.87            | 1.0924        |
| arabonate/xylonate                  | -      | -       | -         | <b>1.9475</b>   | <b>1.5669</b> |
| arachidonate (20:4n6)               | C00219 | 444899  | HMDB01043 | 1.273           | <b>0.5141</b> |
| arginine                            | C00062 | 232     | HMDB00517 | <b>22.8578</b>  | 0.859         |
| asparagine                          | C00152 | 6267    | HMDB00168 | <b>183.3345</b> | 1.2319        |
| aspartate                           | C00049 | 5960    | HMDB00191 | <b>6.7202</b>   | 0.7734        |
| benzoate                            | C00180 | 243     | HMDB01870 | 0.8253          | 0.8114        |
| beta-hydroxyisovalerate             | -      | 69362   | HMDB00754 | 1.0793          | 1.4263        |
| betaine                             | C00719 | 247     | HMDB00043 | 1.6123          | 2.4538        |
| biotin                              | C00120 | 171548  | HMDB00030 | <b>0.8786</b>   | 1.0531        |
| cadaverine                          | C01672 | 273     | HMDB02322 | <b>0.0201</b>   | 0.4265        |
| caproate (6:0)                      | C01585 | 8892    | HMDB00535 | 0.7097          | 1.6797        |
| caprylate (8:0)                     | C06423 | 379     | HMDB00482 | <b>0.4616</b>   | 1.0633        |
| carnitine                           | C00318 | 10917   | HMDB00062 | <b>5.1771</b>   | 1.8015        |
| choline                             | C00114 | 305     | HMDB00097 | <b>1.3477</b>   | 1.1243        |
| choline phosphate                   | C00588 | 1014    | HMDB01565 | <b>0.7326</b>   | 1.025         |
| cis-uocanate                        | -      | 1549103 | HMDB34174 | <b>0.2067</b>   | 1.0344        |
| citrate                             | C00158 | 311     | HMDB00094 | <b>0.1459</b>   | <b>3.0763</b> |
| citrulline                          | C00327 | 9750    | HMDB00904 | 1.4624          | 0.9913        |
| creatine                            | C00300 | 586     | HMDB00064 | 0.7904          | 1.7461        |
| creatinine                          | C00791 | 588     | HMDB00562 | <b>2.5136</b>   | 0.7693        |
| cysteine                            | C00097 | 5862    | HMDB00574 | <b>3.1885</b>   | 1.1769        |
| cysteine s-sulfate                  | C05824 | 115015  | HMDB00731 | <b>160.7614</b> | 2.2195        |
| cysteine sulfinic acid              | C00606 | 109     | HMDB00996 | <b>3.6761</b>   | 0.9508        |
| cysteine-glutathione disulfide      | -      | 4247235 | HMDB00656 | <b>2.2084</b>   | <b>2.4116</b> |
| cysteinylglycine disulfide          | -      | -       | HMDB00709 | <b>6.3234</b>   | 1.468         |

|                                             |        |          |           |                 |               |
|---------------------------------------------|--------|----------|-----------|-----------------|---------------|
| cystine                                     | C00491 | 67678    | HMDB00192 | <b>21.0063</b>  | 1.3741        |
| cytidine                                    | C00475 | 6175     | HMDB00089 | <b>5.3697</b>   | <i>1.3168</i> |
| cytosine                                    | C00380 | 597      | HMDB00630 | 0.5698          | 1.4199        |
| deoxycarnitine                              | C01181 | 134      | HMDB01161 | <b>0.0057</b>   | <i>1.1325</i> |
| diacetylspermidine                          | -      | -        | -         | <b>0.1923</b>   | 1.151         |
| dihomo-linoleate (20:2n6)                   | C16525 | 6439848  | HMDB05060 | <i>0.9362</i>   | <b>0.4834</b> |
| dihomo-linolenate (20:3n3 or n6)            | C03242 | 5280581  | HMDB02925 | <i>0.9991</i>   | <b>0.4844</b> |
| dihydroorotate                              | C00337 | 648      | HMDB03349 | <b>0.209</b>    | <b>0.3</b>    |
| dimethylarginine (Symmetric and Assymetric) | C03626 | 123831   | HMDB01539 | 1.0663          | 1.0362        |
| dodecadienoate (12:2)                       | -      | -        | -         | <b>0.398</b>    | <b>2.1497</b> |
| eicosapentaenoate (EPA; 20:5n3)             | C06428 | 446284   | HMDB01999 | <b>1.4639</b>   | <b>0.6807</b> |
| erucate (22:1n9)                            | C08316 | 5281116  | HMDB02068 | <b>1.2439</b>   | 1.0827        |
| erythritol                                  | C00503 | 222285   | HMDB02994 | <b>0.2976</b>   | 1.4114        |
| erythronate                                 | -      | 2781043  | HMDB00613 | 0.8711          | 1.3089        |
| folate                                      | C00504 | 6037     | HMDB00121 | <b>0.8888</b>   | 1.0803        |
| formiminoglutamate                          | C00439 | 439233   | HMDB00854 | <b>0.0702</b>   | 0.9958        |
| fructose                                    | C00095 | 5984     | HMDB00660 | <b>20.9323</b>  | 1.2444        |
| fumarate                                    | C00122 | 444972   | HMDB00134 | <b>0.0882</b>   | 0.4654        |
| gamma-glutamylmethionine                    | -      | 7009567  | HMDB29155 | 1.4332          | 1.5369        |
| gamma-glutamylthreonine                     | -      | 76078708 | HMDB29159 | 1.3979          | 2.6691        |
| gluconate                                   | C00257 | 10690    | HMDB00625 | 0.7856          | 1.8157        |
| glucose                                     | C00031 | 79025    | HMDB00122 | <b>808.2145</b> | 4.3005        |
| glucuronate                                 | C00191 | 444791   | HMDB00127 | <b>1.5971</b>   | 1.1658        |
| glutamate                                   | C00025 | 611      | HMDB00148 | <b>2.4599</b>   | 1.9824        |
| glutamine                                   | C00064 | 5961     | HMDB00641 | <b>3.921</b>    | 1.0715        |
| glutarate (C5-DC)                           | C00489 | 743      | HMDB00661 | <b>0.0072</b>   | 2.0572        |
| glycerate                                   | C00258 | 752      | HMDB00139 | <b>0.3938</b>   | 0.9887        |
| glycerol                                    | C00116 | 753      | HMDB00131 | <b>3.4654</b>   | <b>0.4221</b> |
| glycerol 3-phosphate                        | C00093 | 754      | HMDB00126 | <b>0.0921</b>   | 0.8528        |
| glycerophosphoethanolamine                  | C01233 | 123874   | HMDB00114 | <b>1.948</b>    | 0.8676        |
| glycerophosphoglycerol                      | C03274 | 439964   | -         | 1.8645          | 0.969         |
| glycerophosphorylcholine                    | C00670 | 71920    | HMDB00086 | <b>4.5688</b>   | 0.8988        |
| glycerophosphoserine                        | -      | 3081457  | -         | <b>2.4353</b>   | 0.8236        |
| glycine                                     | C00037 | 750      | HMDB00123 | <b>58.0259</b>  | 1.2767        |
| guanidine                                   | C17349 | 3520     | HMDB01842 | 0.9316          | 0.9403        |
| guanidinoacetate                            | C00581 | 763      | HMDB00128 | 0.8315          | 1.79          |
| guanine                                     | C00242 | 764      | HMDB00132 | <b>0.1639</b>   | 1.724         |
| guanosine                                   | C00387 | 6802     | HMDB00133 | 0.818           | <b>1.2991</b> |
| guanosine 5'-triphosphate                   | C00044 | 6830     | HMDB01273 | 1.0562          | 1.0217        |
| HEPES                                       | -      | 23831    | -         | <b>0.9622</b>   | <b>1.0434</b> |
| heptanoate (7:0)                            | C17714 | 8094     | HMDB00666 | 1.0934          | 1.0476        |
| histamine                                   | C00388 | 774      | HMDB00870 | 0.65            | 0.637         |
| histidine                                   | C00135 | 6274     | HMDB00177 | 8.3691          | 0.6545        |
| hypoxanthine                                | C00262 | 790      | HMDB00157 | 1.3015          | 1.1167        |
| imidazole lactate                           | C05568 | 440129   | HMDB02320 | <b>0.0033</b>   | 1.1903        |
| imidazole propionate                        | -      | 70630    | HMDB02271 | <b>0.0337</b>   | 0.6602        |
| indole-3-carboxylic acid                    | C19837 | 69867    | HMDB03320 | <b>0.4221</b>   | <b>1.4947</b> |
| indoleacetate                               | C00954 | 802      | HMDB00197 | <b>0.0981</b>   | 1.2664        |
| indolelactate                               | C02043 | 92904    | HMDB00671 | <b>0.008</b>    | 0.9858        |
| inosine                                     | C00294 | 6021     | HMDB00195 | <b>0.5046</b>   | 1.5612        |

|                                             |        |               |           |                |               |
|---------------------------------------------|--------|---------------|-----------|----------------|---------------|
| isobutyrylglycine                           | -      | 10855600      | HMDB00730 | <b>0.6484</b>  | <b>0.6231</b> |
| isocitric lactone                           | -      | 98259         | -         | <b>0.3342</b>  | <b>2.2191</b> |
| isoleucine                                  | C00407 | 6306          | HMDB00172 | 1.9351         | 0.483         |
| isovalerate (i5:0)                          | C08262 | 10430         | HMDB00718 | <b>0.0818</b>  | <b>2.7074</b> |
| isovalerylglycine                           | -      | 546304        | HMDB00678 | 0.9558         | <b>0.6477</b> |
| kynurenate                                  | C01717 | 3845          | HMDB00715 | <b>0.0591</b>  | 1.3584        |
| kynurenine                                  | C00328 | 161166        | HMDB00684 | <b>2.0904</b>  | 1.3017        |
| lactate                                     | C00186 | 612           | HMDB00190 | 1.2289         | <b>0.2069</b> |
| leucine                                     | C00123 | 6106          | HMDB00687 | <b>2.5884</b>  | 0.4865        |
| linoleate (18:2n6)                          | C01595 | 5280450       | HMDB00673 | <b>2.166</b>   | <b>0.5977</b> |
| linolenate [alpha or gamma; (18:3n3 or 6)]  | C06426 | 5280934       | HMDB03073 | <b>3.0045</b>  | 0.559         |
| lysine                                      | C00047 | 5962          | HMDB00182 | <b>42.4422</b> | 1.1307        |
| malate                                      | C00149 | 525           | HMDB00156 | <b>0.1668</b>  | 0.4581        |
| malonate                                    | C00383 | 867           | HMDB00691 | <b>0.2733</b>  | 1.2525        |
| malonylcarnitine                            | -      | 22833583      | HMDB02095 | 0.9662         | 1.1769        |
| maltol                                      | C11918 | 8369          | HMDB30776 | <b>44.2799</b> | 1.376         |
| maltose                                     | C00208 | 10991489      | HMDB00163 | <b>2.2192</b>  | 1.2926        |
| mannose                                     | C00159 | 18950         | HMDB00169 | <b>1.6325</b>  | 1.1114        |
| methionine                                  | C00073 | 6137          | HMDB00696 | <b>6.3779</b>  | <b>0.4728</b> |
| methionine sulfoxide                        | C02989 | 158980        | HMDB02005 | <b>8.0633</b>  | 0.4732        |
| methyl indole-3-acetate                     | -      | 74706         | HMDB29738 | <b>0.0962</b>  | <b>2.3227</b> |
| methylsuccinate                             | -      | 10349         | HMDB01844 | <b>0.5393</b>  | 1.1247        |
| 3-(N-morpholino)propanesulfonic acid (MOPS) | -      | 70807;2723950 | -         | <b>0.8086</b>  | 0.9982        |
| myo-inositol                                | C00137 | 892           | HMDB00211 | 1.0398         | 1.0525        |
| N6,N6,N6-trimethyllysine                    | C03793 | 440120        | HMDB01325 | <b>0.6144</b>  | 0.828         |
| N6-acetyllysine                             | C02727 | 92832         | HMDB00206 | <b>0.1975</b>  | 1.9273        |
| N-acetylaniline                             | C02847 | 88064         | HMDB00766 | <b>0.254</b>   | 1.3441        |
| N-acetylarginine                            | C02562 | 67427         | HMDB04620 | 0.3505         | <b>0.3073</b> |
| N-acetylasparagine                          | -      | 99715         | HMDB06028 | <b>0.2145</b>  | 1.2544        |
| N-acetylaspartate (NAA)                     | C01042 | 65065         | HMDB00812 | <b>0.071</b>   | 1.3962        |
| N-acetylcysteine                            | C06809 | 12035         | HMDB01890 | 1.1491         | 0.9408        |
| N-acetylglucosamine/N-acetylgalactosamine   | -      | 24139         | HMDB00215 | 1.2364         | <b>2.0567</b> |
| N-acetylglutamate                           | C00624 | 70914         | HMDB01138 | <b>0.1379</b>  | 1.4232        |
| N-acetylglutamine                           | C02716 | 182230        | HMDB06029 | <b>0.0626</b>  | 1.1265        |
| N-acetylhistamine                           | C05135 | 69602         | HMDB13253 | <b>0.4822</b>  | 1.4336        |
| N-acetylhistidine                           | C02997 | 75619         | HMDB32055 | <b>0.0804</b>  | 1.0363        |
| N-acetylisoleucine                          | -      | 2802421       | HMDB61684 | <b>0.0269</b>  | 1.4932        |
| N-acetyl-isoputrescine                      | -      | -             | -         | <b>0.1004</b>  | 2.4969        |
| N-acetylleucine                             | C02710 | 70912         | HMDB11756 | <b>0.0946</b>  | 0.9754        |
| N-acetylmethionine                          | C02712 | 448580        | HMDB11745 | <b>0.051</b>   | 0.5251        |
| N-acetylmethionine sulfoxide                | -      | 193368        | -         | <b>0.1072</b>  | 1.0635        |
| N-acetylphenylalanine                       | C03519 | 74839         | HMDB00512 | <b>0.0762</b>  | 1.5321        |
| N-acetylproline                             | -      | 322640        | -         | 1.2485         | 0.9874        |
| N-acetylputrescine                          | C02714 | 122356        | HMDB02064 | <b>0.0256</b>  | 0.8357        |
| N-acetylserine                              | -      | 65249         | HMDB02931 | <b>0.1682</b>  | 1.4827        |
| N-acetylthreonine                           | -      | 152204        | -         | <b>0.3477</b>  | 1.0751        |
| N-acetyltryptophan                          | C03137 | 700653        | HMDB13713 | <b>0.4651</b>  | 1.32          |
| N-acetyltyrosine                            | -      | 68310         | HMDB00866 | <b>0.2021</b>  | 1.2845        |
| N-acetylvaline                              | -      | 66789         | HMDB11757 | <b>0.0755</b>  | 1.637         |

|                             |        |         |           |                 |               |
|-----------------------------|--------|---------|-----------|-----------------|---------------|
| N-alpha-acetylorithine      | C00437 | 439232  | HMDB03357 | <b>0.2797</b>   | <b>0.2843</b> |
| N-delta-acetylorithine      | -      | 9920500 | -         | <b>0.1071</b>   | 2.7506        |
| N-formylanthranilic acid    | C05653 | 101399  | HMDB04089 | <b>0.6683</b>   | 0.9248        |
| N-formylmethionine          | C03145 | 439750  | HMDB01015 | <b>0.0835</b>   | 0.6744        |
| N-formylphenylalanine       | -      | 759256  | -         | <b>0.2592</b>   | <b>0.6995</b> |
| nicotinamide                | C00153 | 936     | HMDB01406 | <b>235.6017</b> | 0.9482        |
| nicotinamide riboside       | C03150 | 439924  | HMDB00855 | <b>0.0275</b>   | 0.7568        |
| nicotinate                  | C00253 | 938     | HMDB01488 | <b>0.0804</b>   | 1.2255        |
| ornithine                   | C00077 | 6262    | HMDB03374 | <b>2.6278</b>   | <b>0.2018</b> |
| orotate                     | C00295 | 967     | HMDB00226 | <b>0.0302</b>   | 0.5441        |
| orotidine                   | -      | 92751   | HMDB00788 | <b>0.3283</b>   | 0.9772        |
| o-Tyrosine                  | -      | 91482   | HMDB06050 | 0.8098          | 0.8361        |
| oxalate (ethanedioate)      | C00209 | 971     | HMDB02329 | <b>0.5899</b>   | <b>2.0303</b> |
| pantothenate                | C00864 | 6613    | HMDB00210 | 0.9418          | 1.0783        |
| penicillin G                | C05551 | 5904    | HMDB15186 | <b>10.8042</b>  | 1.1646        |
| phenol red                  | C12600 | 4766    | -         | 1.0701          | 1.053         |
| phenol sulfate              | C02180 | 74426   | HMDB60015 | 1.5021          | 0.571         |
| phenylacetate               | C07086 | 999     | HMDB00209 | <b>0.1936</b>   | 1.7507        |
| phenylacetylglycine         | C05598 | 68144   | HMDB00821 | <b>238.3901</b> | 1.0429        |
| phenylalanine               | C00079 | 6140    | HMDB00159 | <b>1.6916</b>   | 1.1013        |
| phenyllactate               | C05607 | 3848    | HMDB00779 | <b>0.0058</b>   | 1.1619        |
| phenylpyruvate              | C00166 | 997     | HMDB00205 | <b>0.0463</b>   | <b>2.4754</b> |
| phosphate                   | C00009 | 1061    | HMDB01429 | 1.0204          | 0.9847        |
| p-hydroxybenzaldehyde       | C00633 | 126     | HMDB11718 | <b>0.139</b>    | <b>3.0082</b> |
| pipecolate                  | C00408 | 849     | HMDB00070 | <b>0.073</b>    | 1.482         |
| prephenic acid              | C00254 | 1028    | HMDB12283 | <b>0.1314</b>   | <b>2.7017</b> |
| proline                     | C00148 | 145742  | HMDB00162 | <b>50.2089</b>  | 0.8052        |
| pseudouridine               | C02067 | 15047   | HMDB00767 | 1.3036          | 1.0915        |
| putrescine                  | C00134 | 1045    | HMDB01414 | 1.691           | <b>0.3841</b> |
| pyridoxal                   | C00250 | 1050    | HMDB01545 | <b>2.4721</b>   | 1.0497        |
| pyridoxamine                | C00534 | 1052    | HMDB01431 | <b>1.9509</b>   | 1.0787        |
| pyridoxate                  | C00847 | 6723    | HMDB00017 | 0.6362          | 1.5459        |
| pyridoxine (Vitamin B6)     | C00314 | 1054    | HMDB02075 | <b>0.0355</b>   | 0.7413        |
| pyruvate                    | C00022 | 1060    | HMDB00243 | <b>4.6099</b>   | 1.1908        |
| quinatate                   | C00296 | 6508    | HMDB03072 | <b>0.3856</b>   | 0.9122        |
| riboflavin (Vitamin B2)     | C00255 | 493570  | HMDB00244 | <b>0.4987</b>   | 1.1429        |
| ribonate                    | C01685 | 5460677 | HMDB00867 | <b>0.713</b>    | 1.17          |
| S-1-pyrroline-5-carboxylate | C04322 | 1196    | HMDB01301 | 1.084           | <b>1.3649</b> |
| salicylate                  | C00805 | 338     | HMDB01895 | <b>0.1278</b>   | 1.4384        |
| sebacate (C10-DC)           | C08277 | 5192    | HMDB00792 | 1.1021          | 0.9804        |
| sedoheptulose               | -      | 5459879 | HMDB03219 | <b>0.4701</b>   | 1.1118        |
| serine                      | C00065 | 5951    | HMDB00187 | <b>194.6474</b> | 2.0466        |
| spermidine                  | C00315 | 1102    | HMDB01257 | 0.9549          | 0.9479        |
| streptomycin                | -      | 5999    | -         | <b>2.5474</b>   | 1.0129        |
| succinate                   | C00042 | 1110    | HMDB00254 | <b>0.0089</b>   | 0.3952        |
| succinimide                 | C07273 | 11439   | -         | <b>0.367</b>    | 1.154         |
| sulfate                     | C00059 | 1118    | HMDB01448 | <b>3.8232</b>   | 1.0547        |
| thiamin (Vitamin B1)        | C00378 | 1130    | HMDB00235 | <b>0.304</b>    | 0.5615        |
| thioprolinone               | -      | 93176   | -         | <b>1.8682</b>   | 1.2537        |

|                                    |        |        |           |                |               |
|------------------------------------|--------|--------|-----------|----------------|---------------|
| threonate                          | C01620 | 151152 | HMDB00943 | <b>0.4656</b>  | 1.5783        |
| threonine                          | C00188 | 6288   | HMDB00167 | <b>132.011</b> | 1.6174        |
| thymidine                          | C00214 | 5789   | HMDB00273 | <i>1.198</i>   | <i>1.3833</i> |
| thymine                            | C00178 | 1135   | HMDB00262 | <b>0.0351</b>  | 0.9375        |
| trans-4-hydroxyproline             | C01157 | 5810   | HMDB00725 | <b>0.1565</b>  | 1.3776        |
| trans-urocanate                    | C00785 | 736715 | HMDB00301 | <b>0.2652</b>  | 1.0539        |
| triacetate lactone                 | C02752 | -      | -         | <b>0.5979</b>  | 1.2466        |
| trigonelline (N'-methylnicotinate) | C01004 | 5570   | HMDB00875 | 1.1598         | 1.0576        |
| trimethylamine N-oxide             | C01104 | 1145   | HMDB00925 | <b>0.0264</b>  | 1.382         |
| tryptophan                         | C00078 | 6305   | HMDB00929 | <b>7.4127</b>  | 1.3305        |
| tyrosine                           | C00082 | 6057   | HMDB00158 | <b>2.0077</b>  | 0.7596        |
| tyrosol                            | C06044 | 10393  | HMDB04284 | 0.3228         | 2.0773        |
| uracil                             | C00106 | 1174   | HMDB00300 | <b>0.3727</b>  | 0.9969        |
| uridine                            | C00299 | 6029   | HMDB00296 | <b>8.7017</b>  | 1.3099        |
| valine                             | C00183 | 6287   | HMDB00883 | <b>3.1538</b>  | 0.4296        |
| xanthine                           | C00385 | 1188   | HMDB00292 | 0.5519         | 0.8845        |
| xanthopterin                       | -      | 8397   | -         | <b>0.2739</b>  | 1.4042        |
| xanthosine                         | C01762 | 64959  | HMDB00299 | <b>0.2763</b>  | <b>1.734</b>  |

1. Metabolomics database entries for reported metabolites. KEGG: Kyoto Encyclopedia of Genes and Genomes; PUBCHEM: database maintained by the National Center for Biotechnology Information; HMDB: Human Metabolome Database.
2. Fold difference comparisons of metabolites across selected treatments. Calculation: First, the raw abundance of each metabolite was median-scaled for each individual by dividing their metabolite raw abundance by the median raw abundance for that metabolite across the entire data set. Fold difference was then calculated by dividing the median-scaled abundance of the metabolite in the numerator by the median-scaled abundance of that metabolite in the denominator treatment.
3. Bold indicates a metabolite fold change that differed significantly for the indicated comparison. Italics indicate a metabolite with a statistically-significant interaction between both comparisons.
4. PS: Penicillin-Streptomycin antibiotic treatment; NPS: No Penicillin Streptomycin antibiotic.
5. 20%: Tissues treated with 20% oxygen; 1%: Tissues treated with 1% oxygen.
